# Supplementary material for: The Extent of Tumor in the Peritoneum and Liver Influences Outcomes After Surgery for Synchronous Liver and Peritoneal Colorectal Metastases: A Cohort Study
Source: PubMed Central journal article supplement (PMC11561098; doi:10.1007/s12029-024-01139-y), 2024-11-14
Supplement: 12029_2024_1139_MOESM1_ESM.pdf [file 12029_2024_1139_MOESM1_ESM.pdf]

The Extent of Tumor in the Peritoneum and Liver Influences Outcomes after Surgery for Synchronous Liver and Peritoneal Colorectal Metastases: a Cohort Study

Journal of Gastrointestinal Cancer

Pearl Sanchez Salas, Jozef Urdzik, Wilhelm Graf, Bengt Isaksson, Helgi Birgisson

**Supplementary Table 1**

Additional Peroperative and Postoperative data for patients who underwent primary surgery for colorectal cancer metastases in the peritoneum and/or liver regarding extent of liver resection and postoperative complications.

| variable                   | LRx   |              | CRSH+LRx |              | CRSH  |              | p-value   |
|----------------------------|-------|--------------|----------|--------------|-------|--------------|-----------|
|                            | count | (% of total) | count    | (% of total) | count | (% of total) |           |
| Number of patients / group | 485   | (77 %)       | 28       | (4 %)        | 121   | (19 %)       |           |
| Liver resection - wedge    | 97    | (20 %)       | 20       | (71 %)       |       |              | < 0.001"  |
| up to 2 segments           | 132   | (27 %)       | 6        | (21 %)       |       |              |           |
| major                      | 220   | (45 %)       | 2        | (7 %)        |       |              |           |
| extended                   | 36    | (7 %)        | 0        | (0 %)        |       |              |           |
| Clavien-Dindo - 0          | 198   | (41 %)       | 0        | (0 %)        | 0     | (0 %)        | < 0.001** |
| 1                          | 58    | (12 %)       | 6        | (21 %)       | 22    | (18 %)       |           |
| 2                          | 96    | (20 %)       | 15       | (54 %)       | 67    | (55 %)       |           |
| 3a                         | 78    | (16 %)       | 4        | (14 %)       | 14    | (12 %)       |           |
| 3b                         | 21    | (4 %)        | 2        | (7 %)        | 8     | (7 %)        |           |
| 4a                         | 14    | (3 %)        | 1        | (4 %)        | 8     | (7 %)        |           |
| 4b                         | 16    | (3 %)        | 0        | (0 %)        | 1     | (1 %)        |           |
| 5                          | 4     | (0.8 %)      | 0        | (0 %)        | 1     | (0.8 %)      |           |

Additional data regarding extent of liver resection and postoperative complications for patients who underwent surgery for colorectal cancer metastases in the liver and/or peritoneum; LRx - Liver Resection; CRSH - Cytoreductive Surgery and Hyperthermic Intraperitoneal Chemotherapy; Counts with percentage (%); " - LRx vs. CRSH+LRx ; \* - LRx vs. CRSH ; ° - LRx vs. CRSH+LRx vs. CRSH

Corresponding author: Pearl Sanchez Salas  
 Department of Surgical Sciences, Uppsala University  
 e-mail: [pearl.sanchez-salas@uu.se](mailto:pearl.sanchez-salas@uu.se)
